# Supplementary material for: Remote and local drivers of oxygen and nitrate variability in theshallow oxygen minimum zone off Mauritania in June 2014
Source: Copernicus journal article supplement (doi:10.5194/bg-2018-252), 2018-06-15
Supplement: Supplementary file [file bg-2018-252-AC1-supplement.pdf]

Author Response (AR1) by Soeren Thomsen to

Interactive comment on “Remote and local drivers of oxygen and nitrate variability in the shallow oxygen minimum zone off Mauritania in June 2014” by Soeren Thomsen et al.

Anonymous Referee #1

**This manuscript describes a series of glider and ship-borne hydrographic and biogeochemical measurements in the oxygen minimum zone (OMZ) off Mauritania. Through a series of cross-shelf glider transects between 13 and 26 June 2014, the authors show highly variable oxygen distributions within and around the shallow oxygen minimum. Using analytical tools (OMP, etc.) and an outstanding set of biogeochemical data, they identify the role of local (remineralization of organic matter) vs. distant (penetration of the relative oxygen-rich SACW) drivers of the oxygen distribution. The manuscript is well written, the data set is extensive, the analytical methods are clever and useful, and the results are interesting and relevant for the dynamics of the OMZ. I can definitely support its publication but some concerns have to be addressed first.**

We thank Reviewer #1 for the constructive in depth review which helped us significantly to improve the manuscript.

**In my opinion, the main weakness of the manuscript is the lack of dynamical insights. From my point of view, the paper would be much improved by including a description of the circulation patterns in the area and a discussion of their relation to the oxygen distributions. Other than that, I have only some suggestions for the improvement of some particular points and minor comments.**

We agree with the main point of reviewer #1 that the first version of the paper was lacking on dynamical insights. Thus we now include a description of the meridional circulation observed during the measurement program and relate the boundary current variability to the oxygen distribution.

**GENERAL COMMENTS: - As reported in previous studies, the authors claim that the ventilation of the upper thermocline waters is mainly driven by the “remote” supply of SACW with the boundary currents along the African shelf. The dynamics of these currents are described in the introduction, and also mentioned in the discussion in relation to their representation in ocean models. However, in the manuscript, the remote ventilation of the OMZ by SACW is only studied with an “static” interpretation of the water masses distribution. I miss a more dynamical characterization of the study area at the time of sampling. Could you show some ADCP velocities to illustrate what is the mean circulation during the glider samplings and the impacts on O<sub>2</sub> distribution? In figures 3 and 4, strong isopycnal tilting is observed at the shelf break, suggesting some meridional flow. Does this relate to the observed high-oxygen anomalies associated with the penetration SACW or with the location of the OMZ?**

Please note that we decided at first to leave out the dynamical description as it is partly covered in Klenz et al. (2018) (now published). However, as Klenz et al. (2018) focusses more on seasonal timescales and just shows one mean velocity transect, we decided to include the description of the alongshore circulation focusing on its temporal variability during June 2014. For this we use both ship-based ADCP measurements and glider-based velocity estimates. Throughout the cruise we find positive meridional (northward) velocities (as described in Klenz et al. 2018) but with significant short-term variability.

Glider-based depth-averaged velocity estimates are added to Fig. 7a to illustrate variability of meridional velocity and its relation to the observed changes in oxygen. Especially at the beginning of the glider deployment we observe strong northward flow of up to 30 cm/s which is followed by a drastic increase of oxygen concentrations with a time delay of a few days. During the remainder of the deployment the velocities on the shelf break reduce significantly to values between 10 cm/s and 0 cm/s. The ship-based ADCP data reveals that an offshore displacement and shallowing of the undercurrent is responsible for the observed reduction of the meridional velocities on the shelf-break. We added a figure of two ADCP sections from two different time intervals of the alongshore and cross-shore velocity to show this properly. We conclude that the increase in oxygen seen during our observations must result from advection of oxygen from the south. Interestingly this does not go along with a change in water mass properties or an increase of SACW fraction. We only see a very small change in salinity and even a slightly decrease of SACW. We think that it is important to stress that a strong decoupling between classical physical water mass properties and biogeochemical parameters occurs and thus interdisciplinary approaches are needed. We stress this is in the abstract too.

However, we also have to accept that although we have included velocities now we still have a 2D view which is very limiting and does not allow to explain the small scale synoptic tracer distributions e.g. single patches of high SACW or low oxygen etc based on our observations. As we have learned during previous 3D glider-swarm experiments that the 2D approach is not sufficient (please also look into the discussion in Thomsen et al. 2016). One main reason is that without a 3D sampling its not possible to know the initial water mass properties which are advected through a transect within a very short time. Here we assumed that in general higher oxygenation waters are found in the south. Thus it seems reasonable for us to assume that high velocities will result in a slightly delayed increase in oxygen. We believe that the additional velocity data and the resulting new discussion improved the manuscript.

**- I also have some concern regarding the description of the oxygen anomalies in relation to the proportion of SACW. From Figure 4 it seems that the relationship between relatively high-oxygen concentration and the presented distribution of SACW is by far not univocal. For example, the lowest oxygen concentrations close to the shelf break between the 26.1 and 26.28 isopycnals coincide with high proportions of SACW. The TS diagram (Fig 2) and the distributions of the different variables (Figs. 3-5) seem to suggest that the ventilation of the study area is carried out mostly by the densest variety of SACW. I would suggest to separate the contribution of both SACW end-members in figure 4a,f,k and this would help to illustrate how the densest variety ventilates the area (if my interpretation is right). This is something similar as Peña-Izquierdo et al. (2012) did by defining local and a remote varieties of SACW.**

Indeed high proportion of SACW is not always associated with highest oxygen concentrations (both in spatial and temporal evolution) this is because the SACW can stay for a while in the region and respiration will alter the oxygen (and likewise nutrients) in a proportion that is unrelated to the mixing of conservative tracers. We already discussed this in the initial manuscript (e.g at the end of section 4.2.2 old manuscript). We extended this discussion (now section 3.2.2) and state for example: "This analysis suggests a strong modification of typical water mass signals, such as typically high concentrations of oxygen in SACW, are altered at the shelf due to locally enhanced respiration." We conclude in the paper that classical water mass analysis suffers from not resolving changes in oxygen and nutrients though biogeochemical cycling and eventually resolves this by modifying water mass fractions. Thus we perform this interdisciplinary study to show that respiration rates are highly variable in space. The study by Peña-Izquierdo et al. (2012) differs from our

study in two main points: (1) they do not consider the biogeochemical cycling of nutrients and (2) they introduce a virtual water mass (regional SACWcv) which makes interpreting the field a bit complex. In fact (1) and (2) are related. SACWcv was introduced by Peña-Izquierdo et al. (2012) because “the most common water in the shadow zone is the regional SACWcv variety, which is substantially saltier than SACW. Furthermore, the SACWcv has the lowest oxygen concentrations of the three central water masses (Fig. 3b), suggesting that the SACWcv water mass is an old SACW variety that has lost most of its oxygen content while also mixing slowly with the nearby salty NACW”

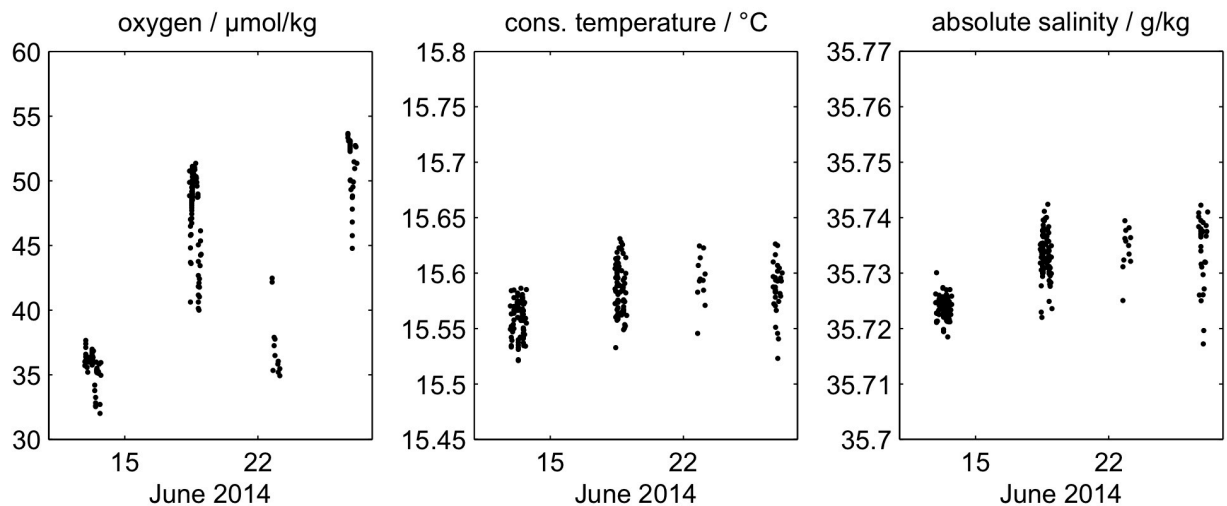

Figure 1: Temporal change in oxygen in  $\mu\text{mol/kg}$  (left), conservative temperature in  $^{\circ}\text{C}$  (middle) and absolute salinity in  $\text{g/kg}$  near the seabed (47 to 55km from the coast) at densities between 26.27 and 26.29 in June 2014.

So this additionally defined SACWcv is characterized by slightly higher salinity but lower oxygen concentrations due to long residence time. However, we observe a significant increase of oxygen concentrations (+15  $\mu\text{mol/kg}$ ) near the coast but almost no change in salinity characteristics. We attached a figure below to illustrate this here. Although the changes in salinity are not relevant in our view (just an increase of 0.015  $\text{g/kg}$  between the first and second near coastal observations) they even contradict the expectations when following the SACW and SACWcv definitions. We see an increase in salinity but an increase of oxygen. Furthermore we want to point to the fact that the oxygen concentrations decrease again significantly towards June 22 but in this case the temperature and salinity stays literally constant. We already discussed parts of this in the original paper (now section 3.2.2, before 4.2.2, “temporal changes of oxygen and nitrate in June 2014”). This water furthermore comes from the south as revealed by our additional velocity analysis. Given that we don’t see drastic changes in pure physical water mass characteristics but large changes of oxygen content we don’t think that a more complex water mass framework will be useful to explain this variations in oxygen. Please note that Peña-Izquierdo et al. (2012) limited their analysis to data below 100-150 m depth in order to avoid the influence of biogeochemical processes.

On contrary as we think that a multi-parameter analysis - including physical processes and biogeochemical cycling is actually needed and this is what we carried out here. The result from this analysis suggests that very high local respiration rates close to the seabed are able to alter water mass properties (e.g. here nitrate and oxygen concentrations) in time

periods of a few weeks. Indeed the lighter water masses are more impacted by this local processes due to the hydrographic situation (slope of isopycnal = descending to coast, and in general higher rates closer to the surface). Thus they also show a large variety of oxygen concentrations (Review Figure 1). We added some more details on this e.g. we mention now also the absolute change in salinity which is very small.

A new study by Klenz et al. (2018) which focusses on the seasonal variability of the boundary current system and the hydrography also highlights the strong seasonal modification of oxygen characteristics in relation to water mass characteristics (SACW) near the shelf break at 18°N and discuss possible local physical and biogeochemical drivers. Their Figure 9 shows the mean SACW fraction and oxygen concentrations from two cruises in March 2011 and in June 2014 (same cruise as presented in this paper but they just use mean properties). Although they observe a higher fraction of SACW during the June 2014 cruise compared to the March 2011 cruise, they observe actually lower oxygen concentrations in June 2014. We conclude that more research focussing on seasonality is needed to really understand these changes which are not explainable by pure physical water mass analysis.

**- The authors describe a third type of oxygen anomaly (low oxygen with non-turbid offshore waters), but they do not describe their drivers in much detail. These anomalies are rather persistent and have some interesting characteristics: they are located just below the pycnocline, they are observed only with the OMP analysis, and generally associated with low contribution of SACW, but there is sometimes an enhancement of SACW in their core. These anomalies correspond generally to relatively high salinities, and I could associate them with the low oxygen values located along the line (15°C, 35.7 g/kg) – (16°C, 35.9 g/kg) in the TS diagram. With this information and some hint about the circulation in the area, the authors could speculate a bit more about the origins of this water body.**

We agree with the reviewer that the third type of oxygen anomalies could receive a bit more attention in the discussion (also suggested by Reviewer 2). In general its difficult to say much about the exact “drivers” and origin of these anomalies as our measurements (especially the sparse in-situ particle abundance measurements) themselves are insufficient to fully understand their origin and formation. Although without 3D high-frequent sampling as mentioned above we learned from previous studies that studying such small features is not possible.

The observed offshore respiration rates cannot explain their creation in a very short time period. However, we might have missed some short term extreme events e.g. associated with strong local respiration events (e.g. due to localised high primary production and the associated export of organic matter e.g. driven by eddies (Karstensen et al. 2015, Schuette et al. 2016) or filamentary structures further offshore (Alvarez-Salgado et al. 2007). As the review mentioned correctly, these anomalies are found just below the pycnocline, this might suggest that local respiration associated with near surface processes might drive these anomalies. Our in-situ observations (particle abundance and respirations rates) show high variability and thus might allow such short term extreme events but are not sufficient to fully answer this question. Another explanation might be that they have been formed near the seabed (same density) but all the particles have already settled due to gravitation or have been remineralised. In this case they would just be an old type of the low O<sub>2</sub> anomalies described in detail.

Please note that both methods reveal these anomalies but with different magnitude due to conceptual differences in both methods. We added a summary of the discussion above to the discussion section (now section 4) of the revised version of the manuscript (first version section 5, discussion).

**SPECIFIC COMMENTS:**

**1 – Section 3.1. Could the authors show the reference profiles for the AOU analysis and the polynomial fit in the T/S or O2/S diagram? I think it could help to the interpretation of some O2 anomalies and the differences with the OMP method.**

We thank the review for this suggestion. We tried to come up with a meaningful incorporation of the 18 reference profiles for the AOU analysis as well as the polynomial fit into the T/S or O2/S space. However, concluded in the end that this might lead to even more confusion. Instead we added now a plot of the reference profiles (AOU and NOx) in density space to Fig. 2. By this we aim to make more clear now that the AOU method does not incorporate any T/S relationships. Its purely based on the density vs. AOU/NOx relationship.

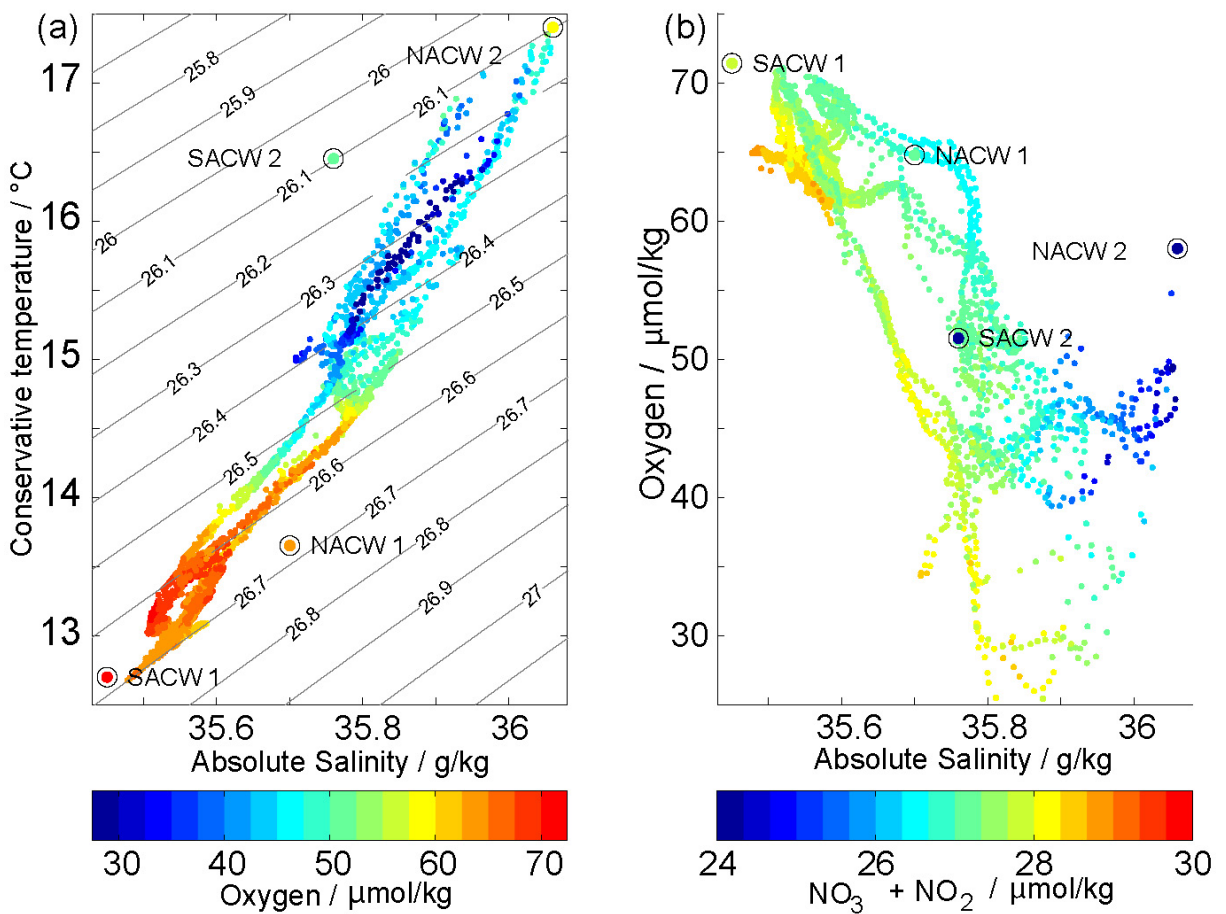

Figure 2: Absolute salinity / conservative temperature (a) and absolute Salinity / dissolved oxygen diagram (b) with dissolved oxygen and NOx concentrations, respectively, in color shading of the offshore reference profiles used for AOU method. The water mass end members of the OMP methods are show for comparison.

Indeed each of the 18 reference profiles for the AOU analysis has an own T/S/O2/NOx relationship with a certain variability especially at shallower depths (see review Fig. 2). For the AOU approach we used a mean AOU or NOx profile in density space obtained by a polynomial fit (see new Fig. 2a, b). This polynomial fit cannot be presented in T/S space as it has no specific temperature or salinity characteristic (but density). Of course we could create also an average temperature and salinity profile and add this to the TS plot. However, to include this and the single reference profile into the T/S space would somehow suggest that the AOU method incorporates T/S signals which is not the case.

However, to allow the reviewer a detailed comparison as requested we added a figure to the review. It shows the 18 reference profiles in T/S and S/O<sub>2</sub> space including the end members of the OMP method. The colorbar range is as in Fig. 2 to allow a comparison. Given that the readers can access the full review after publication we hope that this is a satisfactory solution.

Please note that its not the aim of the paper to make a detailed methodical comparison between both methods. We rather wanted to test the robustness of the spatial distribution and the associated temporal variability of the O<sub>2</sub> and NO<sub>x</sub> anomalies.

**2 – Section 3.2. I think a more detailed description of the OMP method would be desirable. I would like to see which equations have actually been solved. For example, how do you exactly implement the resolution of non-conservative tracers, do you solve the NO (NO = O<sub>2</sub> + r\*NO<sub>3</sub>, where N is the Redfield O<sub>2</sub>:NO<sub>3</sub> ratio) (quasi-)conservative tracer? Also, what is the weight given to each equation?**

Thank you for this comment. We used here the standard set of linear equations that link the mixing of conservative parameters (unknowns are for this part the water mass fractions) with an additional terms that solve for the bulk remineralization/respiration signal (for the non-conservative parameters). The bulk remineralization/respiration is introduced through a first guess Redfield ratio (see Karstensen and Tomczak 1998). This technique and the equations are not new and have been used many times and thus we feel it is sufficient to cite the former work that introduced the technique.

The reviewer referred to what is also known as the "quasi-conservative" approach (that goes back to work by Broecker & Peng 1982 in "Tracers in the Sea"). The "quasi-conservative" approach is different as such that it does not allow to resolve the remineralized/respired contribution (bulk remineralization) but substitute it by creating a linear combination of two properties (in the reviewers example it was oxygen and nitrate). In our extended OMP method the bulk remineralization is explicitly solved - which is only possible by adding it into the mixing equations as a correction term.

We added more details to the reference Karstensen and Tomczak (1998) (equation 4). In Hupe and Karstensen (2000) section 3.1. introduces the normalisation of the non-conservative parameters. Also the weights for to each parameter are given in table 1 now - the weights are empirically estimated.

**3. Figure 4. Can you label the end-members in this figure? They are difficult to identify, particularly in panel B.**

We labeled the end-members in both panels.

**The oxygen color scale in this figure is inverted with respect to Figures 3 and 4.**

We changed the color scale in figure 3 and 4 to be more consistent with figure 2. All have the same range now and non is inverted.

**4 – Section 3.2, Figure 4 and corresponding description. The oxygen and nitrate anomalies obtained with the AOU and OMP methods have different definitions of the zero value, which makes a bit difficult to identify differences between both methods. You could solve that by choosing different predefined O<sub>2</sub> values for the end-members used to compute the anomaly. Instead of using the extreme values (highest oxygen concentration around the end-member) you could use some measure of the mean O<sub>2</sub> value around each end-member. This would make the OMP anomalies more evenly distributed around zero.**

We thank the reviewer for this useful comment. Indeed both methods have different definitions of the zero value due to their different conceptual approach. The AOU approach assumes, as described in section 3.1/2.6 (old manuscript/ revised manuscript), that the offshore water (reference profile) spreads towards the coast along isopycnals. This is a simple 2D view of an upwelling region often found in the literature. However, the fact that the AOU method creates positive anomalies points to the importance of along-shore advection (confirmed by the now included circulation data) as obviously the reference offshore profile did not capture the highest oxygen anomalies associated with SACW.

On contrary the OMP method separates mixing of water mass fractions and bulk remineralization in respect to the defined source water types. Indeed we choose the youngest and thus most extreme SACW and NACW as our end members (revised manuscript Fig 2c, d) and thus only positive (or zero) bulk remineralization / respiration signal are obtained. As the parameter space (T, S, O<sub>2</sub>, NO<sub>x</sub>) has to be covered consistently (youngest NACW and SACW) it is actually not possible to make both methods more similar by changing the oxygen values of the end member to something like “mean values” as suggested by the reviewer.

However, in our opinion the important result is that both methods give the same range (between maximum and minimum values, see colorbar ranges), similar spatial pattern and a robust temporal evolution despite quite different approaches. We also think its valuable that the AOU method reveals positive signals related to water mass transport. Thus we decided to keep both methods as performed in the initial version of the manuscript. However, we extended the discussion on the differences between the two methods at the end of section 2.7 (revised manuscript).

**5- Section 4.1. I would suggest to briefly outline in the text how the distributions in Figure 3 were generated. You could also show the distribution of mixed layer depth in Figure 3, as it is extensively described in the text.**

Thanks for pointing out that more clarity is need how the distributions in Fig. 3 were generated. Please note that a detailed description of the procedure was already given in the caption of Figure 3 itself. As this text is quite technical and we wanted to keep the focus of the text in section 3.1 (revised manuscript) on the scientific results we decided to keep this detail to the caption. As this is probably a matter of taste we hope that the reviewer can accept our decision. However, please note that we now further improved the figure caption (mention the white space, which represents the transition between glider (offshore) and CTD (onshore) data and further made a reference to the figure caption in the result parts of section 3.1. (revised manuscript) at the beginning.

#### **TECHNICAL CORRECTIONS:**

**P4 – L24: “low frequent” → “low frequency”**

Changed. (the reviewer was referring to P4. L. 34 (old manuscript))

**P6 – L17: “See also (Yücel et al., 2015) and (Fiedler et al., 2016) [...]” → “See also Yücel et al., (2015) and Fiedler et al., (2016) [...]”. There are a number of other references for which the parenthesis are not properly placed, particularly in the discussion section. Please revise them: P20 – L9, P21 – L2, P21- L13.**

Corrected.

**P11 – L7: Add a reference to Figure 3b at the end of this sentence: “Highest absolute salinities of 36.08 g/kg were found offshore (> 60 km) and just below the mixed layer at 30 to 35 m depth associated with the STUW.”**

We thank the reviewer for improving the manuscript with this useful suggestions which will help the reader to take up the message quicker. Reference added.

**P11 – L19: Add a reference to Figure 3d at the end of this sentence: “NO<sub>x</sub> concentrations towards the surface of up to 30 μmol kg<sup>-1</sup> are found at 250 m 115 km offshore”**

Reference added.

**P14 – L11: “The OMP method reveals a a higher respiration [...]”, please remove one “a”**

Thanks! One “a” was removed.

**P16 – P5: “ The continues\* advection of SACW from the south via the boundary current system is an oxygen source for the density levels discussed here”, continues→continuous**

Corrected.

**P17 – L12: “[. . .] at 150 m depths”, remove depths**

Removed

**P21 – L11/14: “Nevertheless it is important to note that we observe high concentrations of DOC at the outer edge of the transect pointing the importance of offshore DOC transport as already suggested by (Alvarez-Salgado, 2007) for the northern part of the upwelling area”: important → importance, (Alvarez-Salgado, 2007) → Alvarez- Salgado, et al.. (2007). This reference is incorrect in the reference list, there are multiple coauthors of this paper.**

Sentence modified and corrected. Citation corrected within the whole paper.

Please note that when downloading the official \*.bibtex file from the Wiley page there is only one author. <https://aslopubs.onlinelibrary.wiley.com/doi/10.4319/lo.2007.52.3.1287?cookieSet=1>

## Literature:

Alvarez-Salgado, X. A., Arístegui, J., Barton, E. D., and Hansell, D. A.: Contribution of upwelling filaments to offshore carbon export in the subtropical Northeast Atlantic Ocean, *Limnology and Oceanography*, 52, 1287–1292, 2007.

Karstensen, J., Schütte, F., Pietri, A., Krahnemann, G., Fiedler, B., Grundle, D., Hauss, H., Körtzinger, A., Löscher, C. R., Testor, P., Vieira, N., and Visbeck, M.: Upwelling and isolation in oxygen-depleted anticyclonic mode-water eddies and implications for nitrate cycling, *Biogeosciences*, 14, 2167–2181, 2017.

Karstensen, J. and Tomczak, M.: Age determination of mixed water masses using CFC and oxygen data, *Journal of Geophysical Research: Oceans*, 103, 18 599–18 609, 1998.

Klenz, T., Dengler, M., and Brandt, P.: Seasonal Variability of the Mauritania Current and Hydrography at 18°N, *Journal of Geophysical Research: Oceans*, 0, 2018

Hupe, A. and Karstensen, J.: Redfield stoichiometry in Arabian Sea subsurface waters, *Global Biogeochemical Cycles*, 14, 357–372, 2000.

Peña-Izquierdo, J., Pelegrí, J. L., Pastor, M. V., Castellanos, P., Emelianov, M., Gasser, M., Salvador, J., and Vázquez-Domínguez, E.: The continental slope current system between Cape Verde and the Canary Islands, *Scientia Marina*, 76, 65–78, 2012.



Schütte, F., Karstensen, J., Krahnemann, G., Hauss, H., Fiedler, B., Brandt, P., Visbeck, M., and Körtzinger, A.: Characterization of “deadzone” eddies in the eastern tropical North Atlantic, *Biogeosciences*, 13, 5865–5881, 2016.

Broecker & Peng, in *Tracers in the sea*, Lamont-Doherty Geological Observatory, Columbia University, 1982 - 690, pages
